# Supplementary material for: Differential Effects of Dietary versus Exercise Intervention on Intrahepatic MAIT Cells and Histological Features of NAFLD
Source: MDPI journal article supplement (doi:10.3390/nu14112198), 2022-05-25
Supplement: s1 [file s1]

## SUPPLEMENTARY FIGURES AND TABLES

Differential effects of dietary versus exercise intervention on intrahepatic MAIT cells and histological features of NAFLD

Naimimohasses S, O’Gorman P, Wright C, Ni Fhloinn D, Holden D, Conlon N, Monaghan A, Kennedy M, Gormley J, Beddy P, Finn SP, Lysaght J, O’Sullivan J, Dunne MR, Norris S\* and Moore JB\*

\*Corresponding authors: Suzanne Norris [snorris@tcd.ie](mailto:snorris@tcd.ie) and J. Bernadette Moore [J.B.Moore@leeds.ac.uk](mailto:J.B.Moore@leeds.ac.uk)

### Table of Contents

|                                                               |   |
|---------------------------------------------------------------|---|
| <b>Figure S1.</b> Individual liver enzyme changes .....       | 2 |
| <b>Figure S2.</b> Energy intakes and dietary quality .....    | 3 |
| <b>Table S1:</b> Energy and macronutrient intakes .....       | 4 |
| <b>Figure S3.</b> Individual histological changes.....        | 5 |
| <b>Figure S4.</b> CD69 and CD95 expression in MAIT cells..... | 6 |

**FIGURE S1**

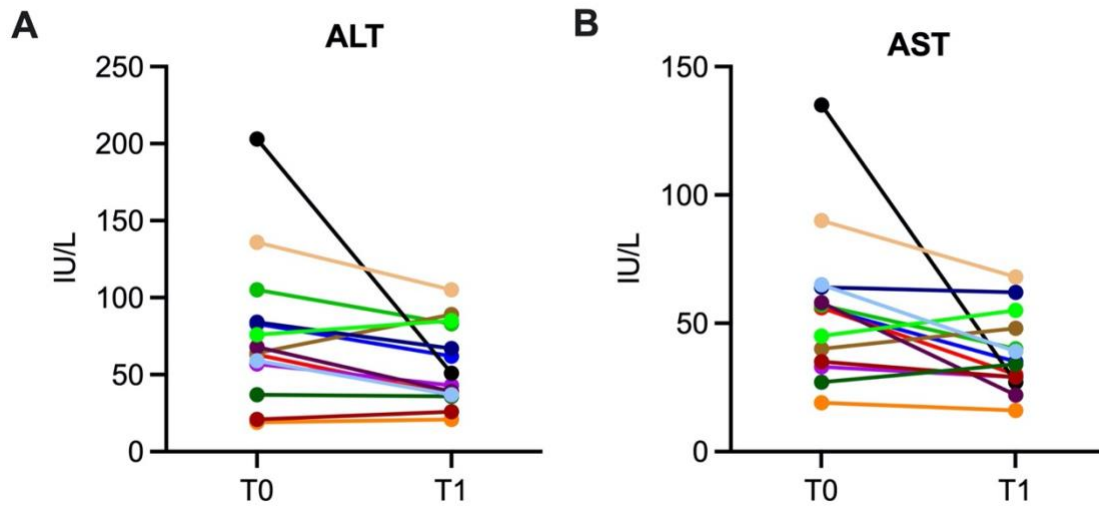

**Figure S1.** Individual liver enzyme changes in control group participants. (A) ALT and (B) AST levels at baseline assessment (T0) and after 12 weeks of standard of care (T1).

**FIGURE S2**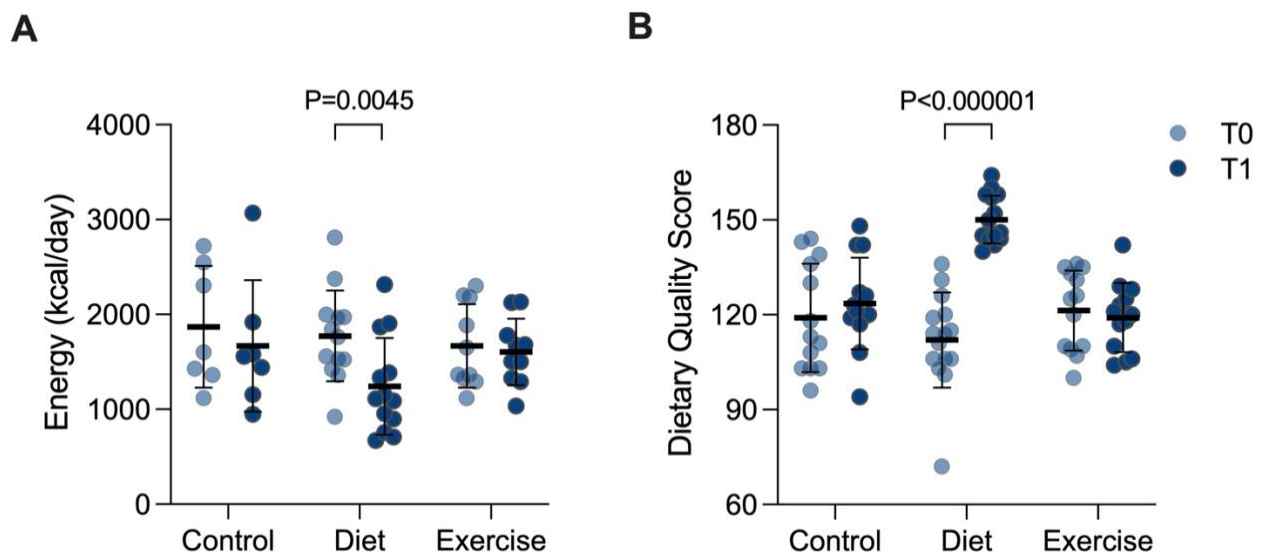

**Figure S2.** Energy intakes and dietary quality before and after diet or exercise intervention. (A) Average daily energy intakes calculated from detailed four-day diet diaries from control (n=7), nutrition (n=13) and exercise (n=10) group participants who completed diaries both before (T0) and after (T1) 12 weeks intervention. (B) Dietary quality assessed through food frequency questionnaire interviews given to control (n=13), diet (n=15) and exercise (n=13) group participants before and after intervention. Data were assessed for normality and analysed by multiple paired t tests. Solid black line and whiskers show mean and standard deviation.

TABLE S1

Table S1: Energy and macronutrient intakes calculated from paired 4-day diet diaries.

|                                  | Control (n=7)  |                |         | Diet (n=13)    |                |               | Exercise (n=10) |                |         |
|----------------------------------|----------------|----------------|---------|----------------|----------------|---------------|-----------------|----------------|---------|
|                                  | T0             | T1             | P value | T0             | T1             | P value       | T0              | T1             | P value |
| Intakes <sup>1</sup>             |                |                |         |                |                |               |                 |                |         |
| Energy (kcal/d)                  | 1869.6 ± 640.8 | 1667.9 ± 692.2 | 0.4342  | 1772.5 ± 479.1 | 1241.7 ± 509.3 | <b>0.0045</b> | 1668.0 ± 440.3  | 1605.0 ± 350.9 | 0.5907  |
| Protein (g/d)                    | 88.3 ± 17.8    | 77.7 ± 23.6    | 0.1563  | 71.8 ± 16.5    | 73.7 ± 21.6    | 0.7501        | 77.4 ± 24.0     | 72.7 ± 18.2    | 0.3579  |
| Protein (%TE)                    | 19.9 ± 4.5     | 19.3 ± 3.3     | 0.5504  | 16.6 ± 2.5     | 24.9 ± 5.4     | <b>0.0003</b> | 18.6 ± 3.5      | 19.3 ± 3.4     | 0.8272  |
| Fat (g/d)                        | 73.3 ± 36.0    | 65.7 ± 43.3    | 0.6250  | 71.1 ± 28.9    | 54.0 ± 27.9    | 0.0803        | 64.1 ± 26.7     | 66.1 ± 19.1    | 0.7648  |
| Fat (%TE)                        | 33.8 ± 8.3     | 33.2 ± 10.0    | 0.8826  | 35.6 ± 8.0     | 38.4 ± 9.6     | 0.3241        | 33.6 ± 7.6      | 36.9 ± 6.5     | 0.2382  |
| SFA (g/day)                      | 26.8 ± 15.9    | 21.6 ± 15.8    | 0.3925  | 24.9 ± 11.9    | 16.5 ± 6.8     | <b>0.0260</b> | 24.4 ± 13.3     | 24.3 ± 9.4     | 0.9636  |
| SFA (%TE)                        | 11.9 ± 4.1     | 10.6 ± 3.6     | 0.3882  | 12.5 ± 4.3     | 12.4 ± 4.4     | 0.9619        | 12.5 ± 4.1      | 13.4 ± 3.2     | 0.4474  |
| Carbohydrate (g/d)               | 213.0 ± 80.0   | 192.7 ± 77.1   | 0.5056  | 184.1 ± 40.1   | 108.9 ± 48.4   | <b>0.0001</b> | 197.2 ± 54.6    | 180.2 ± 45.9   | 0.4045  |
| Carbohydrate (%TE)               | 46.3 ± 9.9     | 47.2 ± 12.0    | 0.8082  | 42.9 ± 9.2     | 35.5 ± 9.6     | <b>0.0475</b> | 47.9 ± 7.4      | 44.9 ± 5.0     | 0.3037  |
| Total sugars (g/d)               | 83.0 ± 42.5    | 61.7 ± 39.5    | 0.2448  | 74.8 ± 30.5    | 41.8 ± 23.9    | <b>0.0024</b> | 80.8 ± 44.0     | 69.8 ± 32.7    | 0.3343  |
| Total sugars (%TE)               | 17.5 ± 5.4     | 14.8 ± 6.5     | 0.3020  | 17.1 ± 5.6     | 13.4 ± 5.3     | 0.0847        | 18.7 ± 6.4      | 17.0 ± 5.4     | 0.3393  |
| Dietary fibre <sup>2</sup> (g/d) | 5.2 ± 4.0      | 7.3 ± 2.8      | 0.1643  | 8.7 ± 5.2      | 7.9 ± 7.3      | 0.4533        | 8.0 ± 3.3       | 7.5 ± 3.4      | 0.5899  |
| Sodium (g/d)                     | 3.1 ± 1.2      | 2.5 ± 1.4      | 0.2099  | 2.4 ± 0.6      | 2.3 ± 0.8      | 0.6770        | 2.6 ± 1.0       | 2.5 ± 0.88     | 0.6441  |

<sup>1</sup>Data were tested for normality using Shapiro-Wilk test and presented as mean ± standard deviation with differences assessed by paired t test. <sup>2</sup>AOAC method. Abbreviations: AOAC, American Association of Analytical Chemists; SFA, saturated fatty acids; TE, total energy.

**FIGURE S3**

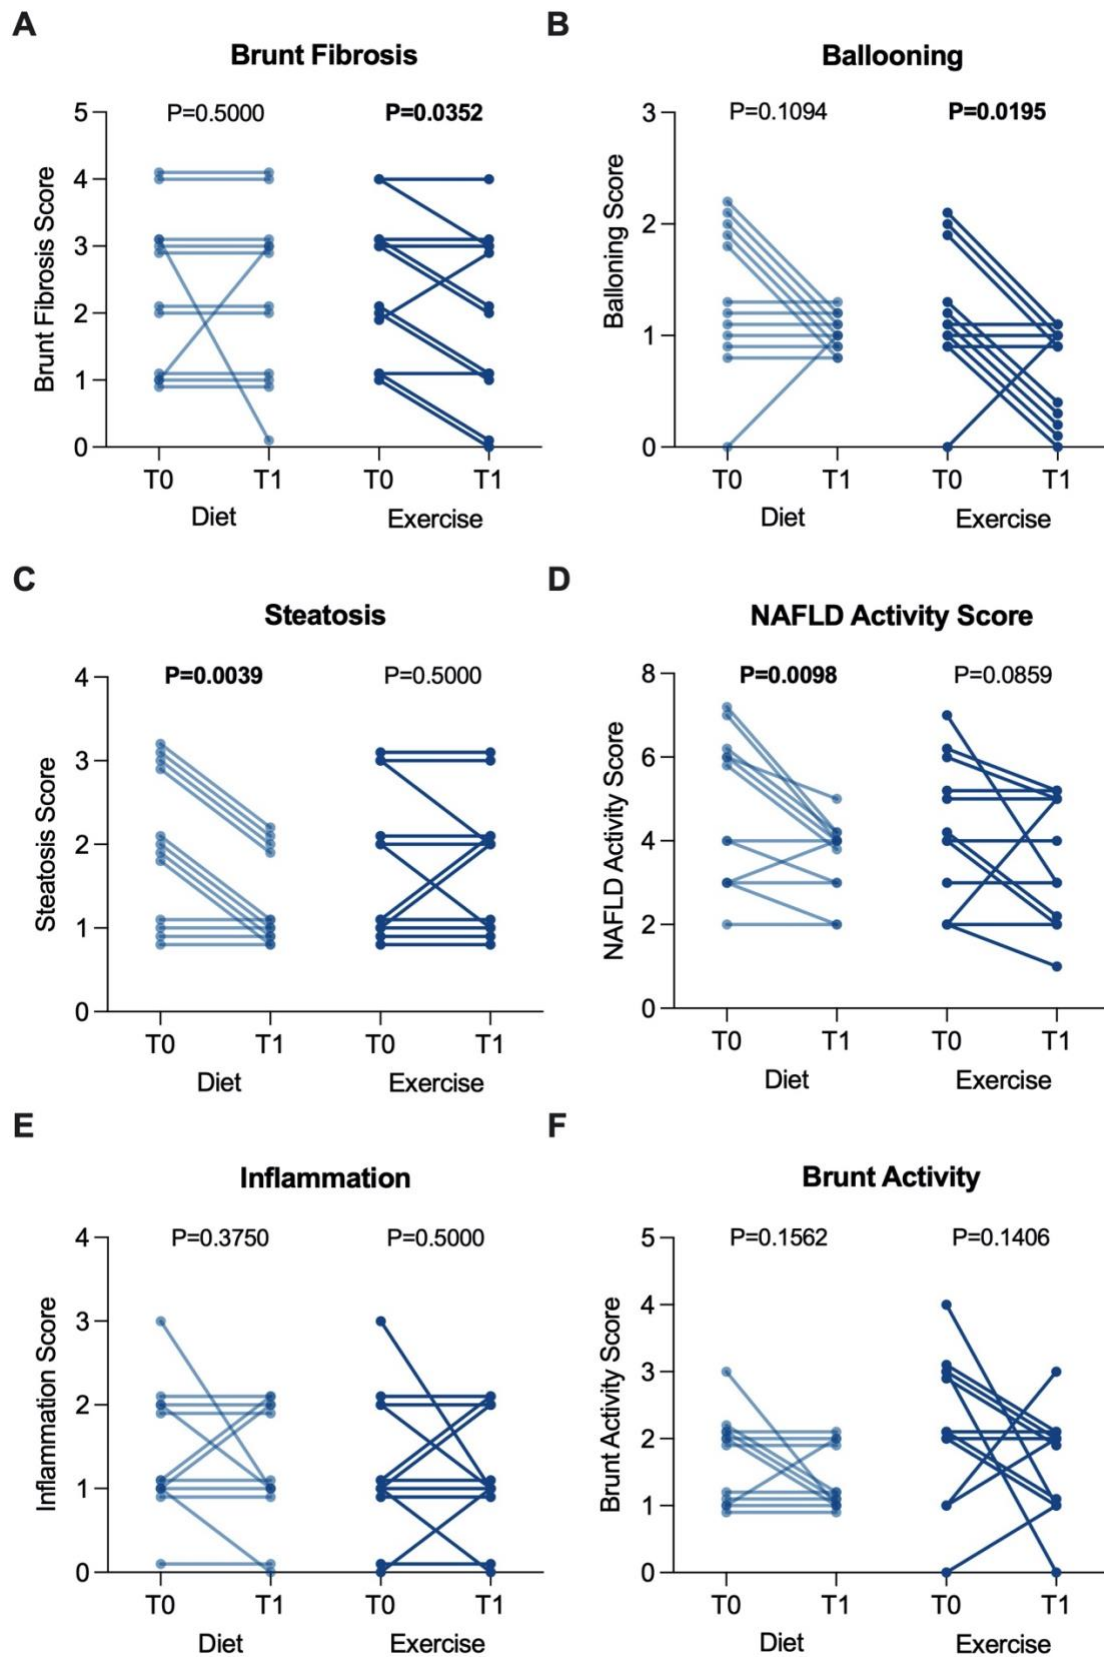

**Figure S3.** Individual histological changes in response to 12 weeks diet or exercise intervention. (A) Fibrosis, (B) Ballooning, (C) Steatosis, (D) NAFLD Activity Score, (E) Lobular inflammation, and (F) Brunt Activity Score. T0, baseline assessment; T1, post intervention assessment.

**FIGURE S4**

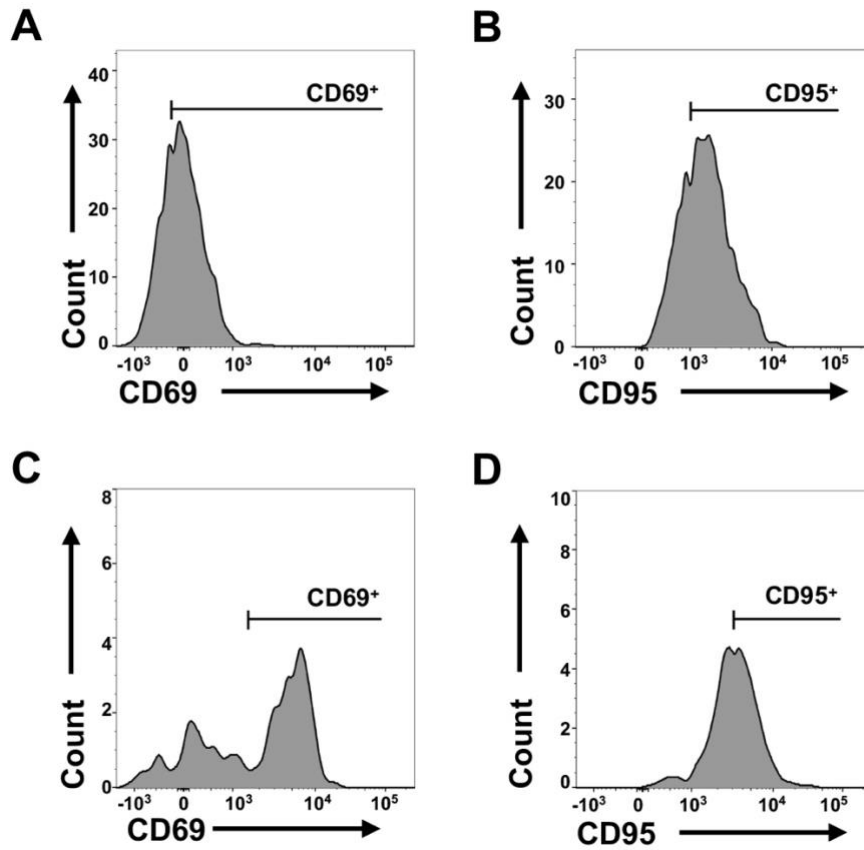

**Figure S4.** CD69 and CD95 expression in MAIT cells. Representative histograms of distribution of surface marker expression on CD3<sup>+</sup> CD161<sup>hi</sup> V $\alpha$ 7.2<sup>+</sup> MAIT cells in peripheral blood (A) and (B); and collagenase-digested liver tissues (C) and (D). Expression calculated from median fluorescent intensity (MFI) of gated regions.
